# Supplementary material for: Machine learning-driven optimization of extraction process and development of quality standards for traditional Chinese medicine (TCM) formulae in primary liver cancer
Source: Royal Society of Chemistry journal article supplement (doi:10.1039/d5ra09650b), 2026-01-01
Supplement: d5ra09650b1.xlsx [file d5ra09650b1.xlsx]

## Sheet: Sheet1
No.	solid–liquid ratio	time/h	extraction cycles/time(s)	extraction yield (%)	Paeoniflorin Content	SD（extraction yield）	SD（Paeoniflorin Content）	RSD（extraction yield）	RSD（Paeoniflorin Content）
1	9.71	1.5	3	39.65	80.89	3.25377	5.75512	7.51854	7.75135
2	9.71	1.5	3	44.24	71.07
3	9.71	1.5	3	45.94	70.78
				43.2767	74.2467
